# Supplementary material for: Kinderneurologische Untersuchung
Source: Springer Nature journal article supplement (doi:10.1007/s00112-023-01877-6), 2023-11-13
Supplement: MOESM1 [file 26296518]

## Supplement 1 Kleiner historischer Exkurs zur Entwicklung der kinderneurologischen Untersuchung

Im Wesentlichen geht die Ordnung der klinischen neurologischen Untersuchung (auch weltweit interkulturell gültig) auf die in der zweiten Hälfte des 19. Jahrhunderts führende französische Neurologie mit ihrem Protagonisten JEAN-MARTIN CHARCOT aus Paris zurück. Dieser die menschliche Anatomie und Physiologie spiegelnde, „neurologische“ Ordnungs- und Struktursinn findet dann in der Psychiatrie Anfang des 20. Jahrhunderts mit den Klassifikationen von EMIL KRAEPELIN von der LMU München ein eigenes, psychopathologisches Pendant.

In den 1970-er Jahren ist es das Verdienst der niederländischen Kinderneurologie um BERT C.L. TOUWEN aus Groningen, die neurologische Untersuchung „kindgerecht“ differenziert zu haben: der Bereich „Koordination“ wird wesentlich erweitert, systematisiert und semantisch anders gefasst; die Betonung der Dimension Entwicklung macht aus der neurologischen eine kinderneurologische Untersuchung. Diese Arbeiten münden in dem 1982 erstmalig ins Deutsche übersetzten Buch „Die Untersuchung von Kindern mit geringen neurologischen Funktionsstörungen“ und werden von MIJNA HADDERS-ALGRA, ebenfalls aus Groningen, konzeptuell und methodisch unter dem Namen MND (Minor Neurological Dysfunction, Milde Neurologische Dysfunktion) ins 21. Jahrhundert geführt.

Auch hier ergibt sich eine historische Parallelität zu den *Neurological Soft Signs (NSS)* der Neurologie und Psychiatrie, die als klinische „Risikodomäne“ für psychiatrische Erkrankungen angesehen werden. Dieser Aspekt findet sich ebenso in der Kinderneurologie für Erkrankungen wie ADHS, Lernstörungen, Autismus, Developmental Coordination Disorder (DCD), umschriebene oder globale Entwicklungsstörungen etc., etc., auch hier ist die klinische Diagnose einer komplexen milden neurologischen Dysfunktion (cMND) wegweisend.

In der Kinderneurologie in Deutschland war es RICHARD MICHAELIS aus Tübingen, der – sich betont als Entwicklungsneurologe verstehend – den Fokus auf die Systematisierung der Neurologie der ersten beiden Lebensjahre (und dann bis zum Schulalter) gelegt hat. Seine „Tübinger Untersuchungsbögen“ sind praktisch bewährte und validierte Orientierung im deutschsprachigen Raum und haben in kinderneurologischen Lehrbüchern ebenso Eingang gefunden wie in dem „Gelben Heft“ (Quellen: siehe Literaturverzeichnis).

Die Grundelemente der neurologischen Untersuchung und ihre altersbezogene Differenzierung tauchen in „allen“, konzeptuell durchaus unterschiedlichen „Test-Zusammenstellungen“ von A wie Movement ABC-2 über B wie Bailey bis zu Z wie Zürcher

Neuromotorik auf. Je nach Setting und Fragestellung (Hausärztliche Praxis, Fachärztliche Praxis, Sozialpädiatrisches Zentrum, Fachklinik/Rehabilitationsklinik, Kinderklinik, Universitätskinderklinik) wird man sich für eine Auswahl an die ärztlich kinderneurologische Untersuchung ergänzenden Tests entscheiden.

Für die ärztlich-diagnostische Qualität bleibt – wie oben gesagt – entscheidend, dass die verfügbaren Tests eine ärztliche Untersuchung ergänzen, nicht ersetzen.

Anders ausgedrückt: Nur die ärztlich durchgeführte kinderneurologische Untersuchung erlaubt eine gezielte, effiziente, aussagesichere, ressourcenschonende und klinisch adaptive Vorgehensweise, nur sie erlaubt das notwendige Grundverständnis der einzelnen Tests.
