# Supplementary material for: Kinderneurologische Untersuchung
Source: Springer Nature journal article supplement (doi:10.1007/s00112-023-01877-6), 2023-11-13
Supplement: MOESM2 [file 26296518]

## Fallbeispiel

### Neuropädiatrische Untersuchung AKUT (Supplement 2)

Ein 15-jähriger Jugendlicher stellt sich an einem Vormittag in der Zentralen Notaufnahme (ZNA) der Kinderklinik mit akut einsetzendem Schwindel seit 3 Stunden, bifrontalen Kopfschmerzen und verlangsamter Sprache vor. Die Symptomatik trete zum ersten Mal auf, habe während des Videospielens begonnen. Er habe sich ungewöhnlich müde gefühlt und sich ins Bett gelegt. Bei persistierender Symptomatik stellt er sich schließlich im Beisein der besorgten Mutter vor. Zuvor sei er – bis auf eine leichte Erkältung ohne Fieber vor etwa sechs Wochen – gesund gewesen. Ein Schädel-Hirn-Trauma sei nicht erinnerlich. Die Einnahme von Medikamenten, Alkohol oder Drogen wird glaubhaft verneint. Die Impfungen sind nach STIKO-Empfehlungen erfolgt. Die Entwicklung ist in jeder Hinsicht normal verlaufen. Die Familienanamnese ist bis auf einen Herzinfarkt im Alter von 79 Jahren bei der Großmutter mütterlicherseits blande. Insbesondere das Auftreten von Migräne, Epilepsie oder Gerinnungsstörungen in der Familie werden verneint. Der Junge hat zwei gesunde Brüder.

#### **Die neurologische Untersuchung wird im Beisein der Mutter durchgeführt:**

Die Untersuchung zeigt einen wachen, voll orientierten, männlichen 15-jährigen Jugendlichen in adipösem Ernährungszustand und stabilem Allgemeinzustand. GCS 15. Er verhält sich in der Untersuchungssituation kooperativ, jedoch auffallend langsam. Er zeigt wenig Interesse an wechselseitiger Kommunikation, wirkt zurückhaltend, hält nur kurz Augenkontakt. Er folgt den Aufforderungen genau, aber in „Zeitlupe“, das Sprachverständnis scheint nicht eingeschränkt. Seine Antworten auf Fragen sind kurzgehalten (1-2 Worte), dabei inhaltlich korrekt. Kein Meningismus.

**Somatogramm:** Körpergewicht: 97 kg (> 97. Perzentile), Körpergröße 180 cm (70. Perzentile), Kopfumfang in ZNA nicht gemessen.

**Vitalparameter:** HF 80/min, RR 121/72 (88) mmHg, SpO<sub>2</sub> 99 %, AF 15/min, Temp. 36,5°C. BZ 105 mg/dL.

**Hirnnerven** (rot): Augenstellung unauffällig. Pupillen isokor, Lichtreaktion direkt und indirekt seitengleich und prompt. Blickfolgebewegungen horizontal und vertikal glatt und frei. Geringfügiger Endstellnystagmus. Keine Ptosis. Orientierende Gesichtsfelduntersuchung unauffällig. Geräuschquelle wird lokalisiert. Mimik variabel und symmetrisch, Mund in Ruhe meist geschlossen. Zunge wird mittig herausgestreckt, Uvula mittig, Gaumensegel hebt sich. Zungenmotilität frei. Schultern werden seitengleich und kräftig angehoben. Nach

Aufforderung werden die Worte „Pata-Pata“ langsam und monoton ausgesprochen und nach 3 Wiederholungen beendet.

Die Mutter fügt an dieser Stelle ein, dass er normalerweise schneller und mehr rede. Keine Heiserkeit.

**Reflexe** (orange): BSR, PSR, ASR sind seitengleich mittellebhaft. Keine verbreiterten Reflexzonen. Keine Kloni. Babinski beidseits negativ.

**Motorik** (gelb): Beim Aufsetzen und Aufstehen ist eine leichte Unsicherheit zu bemerken bei kompensierbarer rechtsbetonter Fallneigung. Beim Gehen zeigt sich ein breitbeiniges Gangbild mit plumpem Aufsetzen des rechten Fußes und ein reduziertes Abrollen im Vergleich zur Gegenseite. Die Muskelkraft der oberen und unteren Extremität liegt beidseits bei 5/5, lediglich der Faustschluss rechts liegt bei 4+/5. Der Muskeltonus ist beidseits unauffällig. Beim Zehengang ist eine Asymmetrie mit eingeschränkter Durchführbarkeit rechts sichtbar. Der Hackengang wird vorzeitig durch den Patienten abgebrochen, so auch der Seiltänzerengang. Der Einbeinstand ist rechts nicht möglich, links unsicher (Dauer max. 5 s). Beim Romberg-Test wird die zuvor beobachtete Fallneigung beim Augenschluss nicht verstärkt. Beim Armvorhalteversuch wird der linke Arm konstant in der Höhe gehalten, während der rechte Arm ataktische Bewegungen macht.

**Sensibilität** (hellblau): Berührungs- und Schmerzempfinden sind in Gesicht, an Unterarmen und Handrücken sowie Fußrücken seitengleich und unbeeinträchtigt.

**Koordination** (dunkelblau): Die Finger-Daumen-Opposition linksseitig ist schnell und flüssig, rechtsseitig hingegen deutlich verzögert. Ebenso imponiert eine Dysdiadochokinese rechts. Der Knie-Hacke-Versuch rechts zeigt eine gering überschießende Reaktion, linksseitig wird dieser zielgerichtet und flüssig durchgeführt.

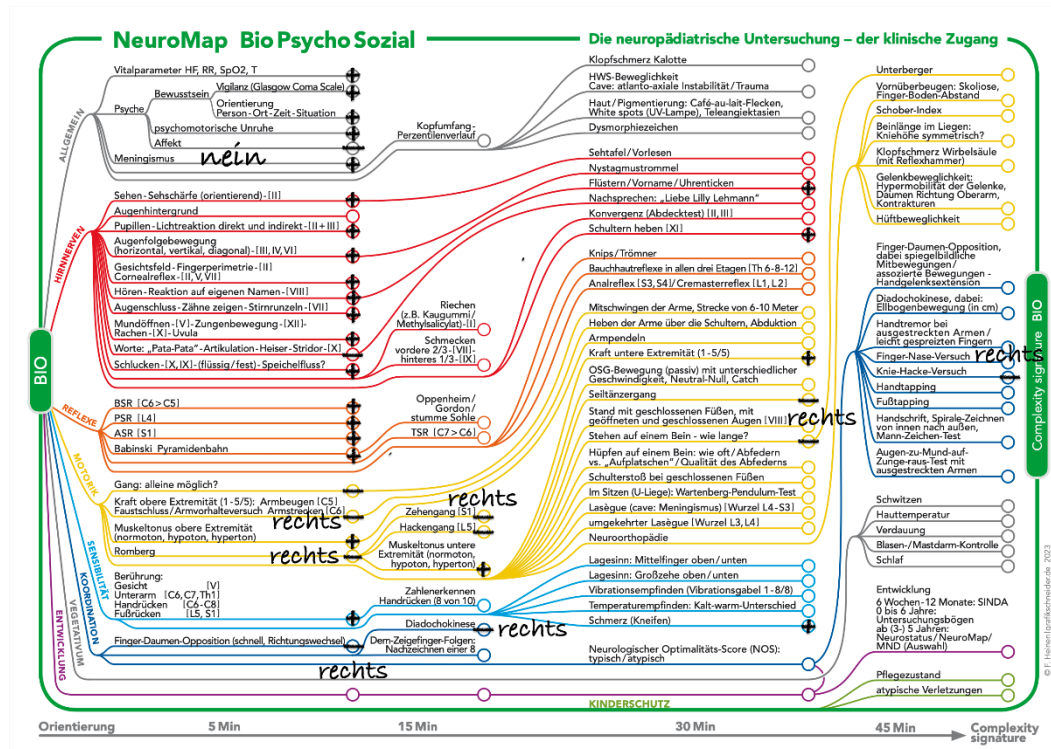

## Diagnosen:

Akut aufgetretenes fokal-neurologisches Defizit rechts mit Ataxie, (Koordinationsstörung) und Dysarthrie (bestätigt durch das Erstscreening-Tool ‚BE FAST!‘).

Die neurologische Untersuchung (**Dauer insgesamt: <10 min**) wird hier abgeschlossen und eine sofortige Bildgebung bei DD Dekompensation RF/Pediatric Stroke/Blutung eingeleitet. 40 Minuten später zeigen sich im Schädel-MRT Zeichen eines akut ischämischen Kleinhirnfarkts mit Verschluss der A. cerebelli superior.

### **Neuropädiatrische Untersuchung CHRONISCH (Supplement 3)**

Derselbe 15-jährige Patient stellt sich drei Monate nach Diagnosestellung des Kleinhirn-Infarktes beim Pediatric Stroke-Team im integrierten Sozialpädiatrischen Zentrum zur klinischen Verlaufskontrolle im Beisein der Mutter vor. Es erfolgte nach der Akutphase in der erstversorgenden Kinderklinik eine Direktverlegung in eine neuropädiatrische Fachklinik zur stationären Frührehabilitation über 4 Wochen. Aktuell erhält der Jugendliche noch einmal wöchentlich Ergotherapie. Die Einnahme von ASS (Acetylsalicylsäure) als Thrombozytenaggregationshemmer erfolge regelmäßig und nebenwirkungsfrei.

Die initiale Dysarthrie habe sich bereits eine Woche nach der Diagnose Stroke deutlich gebessert und sei nun unbeeinträchtigt. Der Patient berichtet, dass seine rechte Hand noch nicht so funktioniere wie zuvor. Als Rechtshänder schränke ihn dies am meisten ein. Das Halten eines Stiftes habe er wieder erlernt, jedoch bereite ihm das Ausführen gezielter Bewegungen weiterhin Probleme und nehme mehr Zeit in Anspruch.

Er besucht seit zwei Wochen seine alte Klasse (9. Klasse einer Realschule). Der Wiedereinstieg in der Schule sei nicht leicht gewesen. Über seine Erkrankung spreche er dort nur ungern. Vor dem Schlaganfall habe er gute bis durchschnittliche Noten erzielt, eine schulische Leistungskontrolle sei seit Rückkehr in die Schule noch nicht erfolgt. Er bemerke jedoch, dass er sich nach ca. 30 min Schulstunde nicht mehr gut konzentrieren könne. Ebenso benötige er beim Schreiben mehr Zeit. Zweimal musste er die Schule aufgrund von Kopfschmerzen vorzeitig verlassen.

Sein Freundeskreis blieb konstant. Abends fühle er sich jedoch häufig müde. Einladungen zu Freunden komme er deshalb nicht nach, Nachrichten/Anrufe lasse er meist unbeantwortet. Er ziehe es vor, allein zuhause Videospiele zu spielen, teils zwei bis fünf Stunden täglich. Seine alleinerziehende Mutter zeigt sich diesbezüglich besorgt. Da sie mehrmals die Woche bis in die Abendstunden arbeitet, kann sie ihn nicht regelmäßig unterstützen. Vor dem Schlaganfall habe der Patient in seiner Freizeit gelegentlich Fußball mit Freunden gespielt und unregelmäßig das Fitnessstudio besucht. Beides habe er bislang nicht wiederaufgenommen. In den letzten 3 Monaten habe er 2 kg Körpergewicht zugenommen. Schlafstörungen oder Verdauungsstörungen werden verneint.

### **Klinisch-neurologische Untersuchung (Dauer 40 min)**

15 Jahre alter Jugendlicher, voll orientiert zu Person, Ort, Zeit und Situation. GCS 15. Kein Meningismus.

Der Junge verhält sich in der Untersuchungssituation motiviert und kooperativ. Er hat Interesse an wechselseitiger Kommunikation, zeigt zugewandten Blickkontakt und

responsive Mimik. Situationsadäquate Stimmung, aber Bericht von ‚Niedergedrücktsein‘, regelhafte Ausdauer und Aufmerksamkeit im 1:1-Untersuchungskontakt. Angemessenes Nähe-Distanz-Verhalten.

**Somatogramm:** Körpergewicht: 99 kg (> 97. Perzentile), Körpergröße: 180 cm (70. Perzentile), BMI: 30,6 kg/m<sup>2</sup> (> 99. Perzentile), Kopfumfang: 57 cm (75. Perzentile, Verlauf perzentilengerecht).

**Vitalparameter:** HF 65/min, RR 119/69 (84) mmHg, SpO<sub>2</sub> 99 %, AF 15/min, Temp. 37,0°C.

**Hirnnerven** (rot): Hirnnerven seitengleich intakt, keinerlei Einschränkungen.

**Reflexe** (orange): BSR, TSR, PSR, ASR seitengleich lebhaft. Keine verbreiterten Reflexzonen. Keine Kloni. Bauchhautreflexe in allen drei Etagen intakt. Babinski-Reflex beidseits negativ.

**Motorik** (gelb): Die Fingerbeugung der rechten Hand ist endgradig leicht eingeschränkt (4+/5), sonst Kraftgrad allseits 5/5. Im Sitzen und Stehen milde Hypotonie mit Zusammensinken des Rumpfes bei sonst stabiler Haltungskontrolle mit symmetrischer Kopf- und Rumpfhaltung und lockerer, symmetrischer Haltung der Extremitäten. Im Stehen lockere Hüft- und Kniestreckung beidseits, beide Füße werden voll belastet.

Beim Armvorhalteversuch noch residuelle ataktische Bewegungen des rechten Arms sichtbar. Variable, gut angepasste Spontanbewegung links > rechts. Greifen der rechten Hand langsamer sowie Kraftdosierung ineffektiver im Vergleich zur Gegenseite. Kein rhythmischer Tremor. Beidhändiges Hantieren mit Dominanz der rechten Hand und starker Assistenzfunktion der linken Hand (Rechtshänder).

Gehen mit schmaler Basis, Gleichgewicht sicher bei langsamen Bewegungen, beim schnellen Gehen oder Ablenkung geringes Abweichen der Richtungsachse, Mitschwingen des rechten Arms eingeschränkt. Die Füße werden plan aufgesetzt, das Abrollen rechts dezent vermindert. Zehengang sicher. Hackengang rechtsseitig eingeschränkt. Seiltänzerengang durchführbar mit Ausgleichsbewegungen nach etwa 6 Schritten sowie minimal assoziierten Mitbewegungen (rechtsseitig leichte Ellenbogenextension und Dorsalflexion des Handgelenks sichtbar). Der Einbeinstand rechts unsicher (Dauer 6-7 Sekunden), links stabil über 10 Sekunden. Beim Einbeinhüpfen (fünf Wiederholungen pro Seite) wenig Höhengewinn und reduziertes Abfedern rechts > links. Treppensteigen mit leichtem Zeitverzug ohne Halt am Geländer im Wechselschritt. Unterberger-Tretversuch negativ.

**Sensibilität** (hellblau): Berührungs-, Schmerz-, Vibrations- und Temperaturempfinden seitengleich und unbeeinträchtigt, so auch Lagesinn und Graphästhesie.

**Koordination** (dunkelblau): Die Finger-Daumen-Opposition linksseitig ist schnell und flüssig, es kann jedoch eine spiegelbildliche Mitbewegen der rechten Hand beobachtet werden. Die

Finger-Daumen-Opposition rechtsseitig hingegen ist weiterhin verzögert. Beim Handtapping rechts wird der Ellenbogen mitbewegt, die Bewegungsabläufe sind unkoordinierter und langsamer im Vergleich zur Gegenseite. Persistierende leichte Dysdiadochokinese rechts. Knie-Hacke-Versuch rechts leicht atypisch bei einmaliger Fehlplatzierung der Ferse und einmaligem Abrutschen beim Entlanggleiten. Gute Stifthaltung rechts, Kräfteinsatz beim Zeichnen intermittierend unsicher/zu viel. Linienbegrenzung beim Ausmalen mit rechter Hand überschritten unter Zeitdruck.

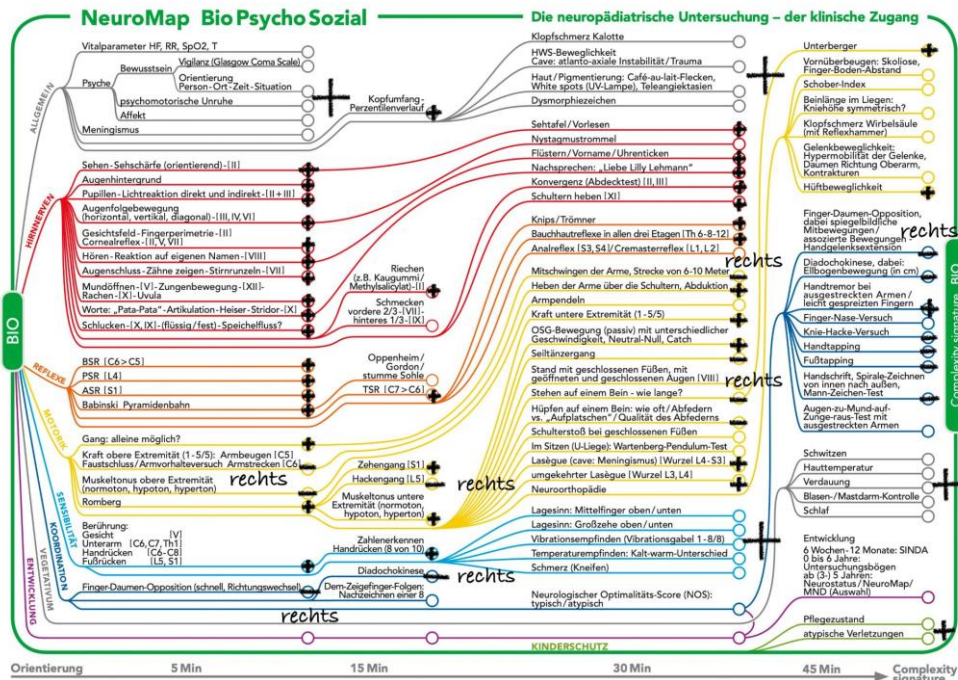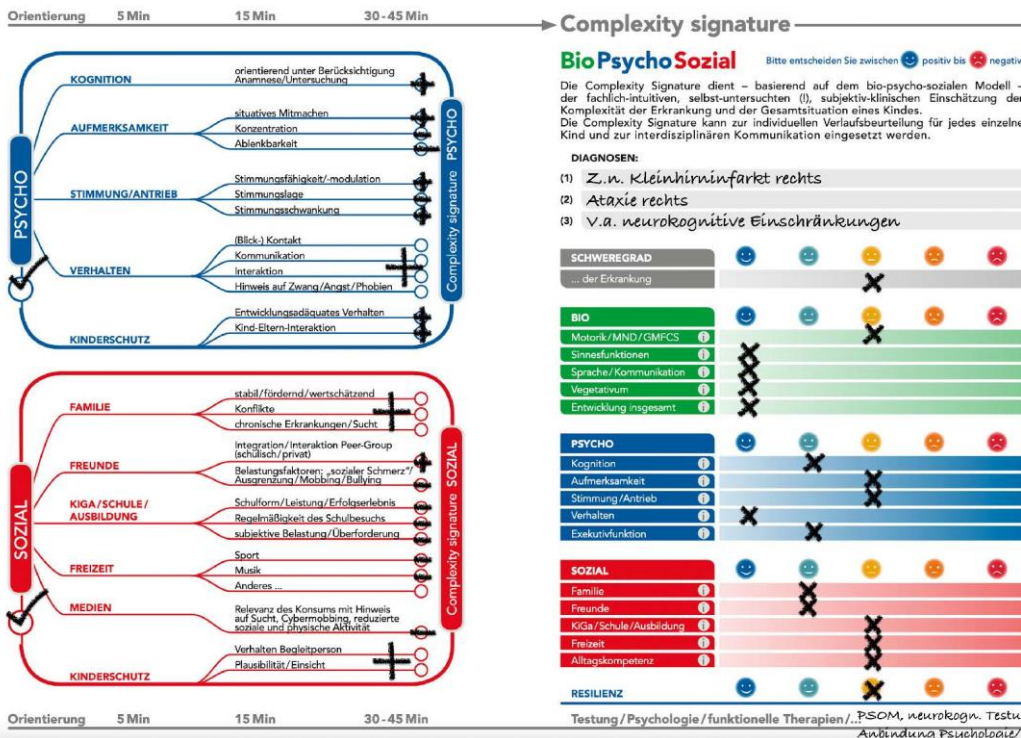

### **Diagnosen:**

#### **Kleinhirnfarkt rechts (3/2023, Z.n.)**

Ätiologie: nicht gesichert, Verschluss der Arteria cerebelli superior (V.a. embolischen Ursprung)

Kein Hinweis auf: Gerinnungsstörung, kardiale Ursache, Dissektion Halsgefäße, Infektion/Vaskulitis

Motorik: Alltagskompensierte Ataxie rechts

Neurokognition: V.a. Störung von Arbeitsgeschwindigkeit, Arbeitsgedächtnis, Konzentration, Aufmerksamkeitsspanne, etc. bei rascher Ermüdbarkeit, V.a. depressive Anpassungsstörung

Adipositas

### **Testungen:**

PSOM (Pediatric Stroke Outcome Measure) zur Stroke-Verlaufskontrolle

Psychologische, neurokognitive Testung

Einbindung/Anbindung therapeutische Psychologie/KJP
